# Supplementary material for: A modular toolbox for gRNA–Cas9 genome engineering in plants based on the GoldenBraid standard
Source: PubMed Central journal article supplement (PMC4736081; doi:10.1186/s13007-016-0101-2), 2016-02-01
Supplement: 13007_2016_101_MOESM1_ESM.pdf [file 13007_2016_101_MOESM1_ESM.pdf]

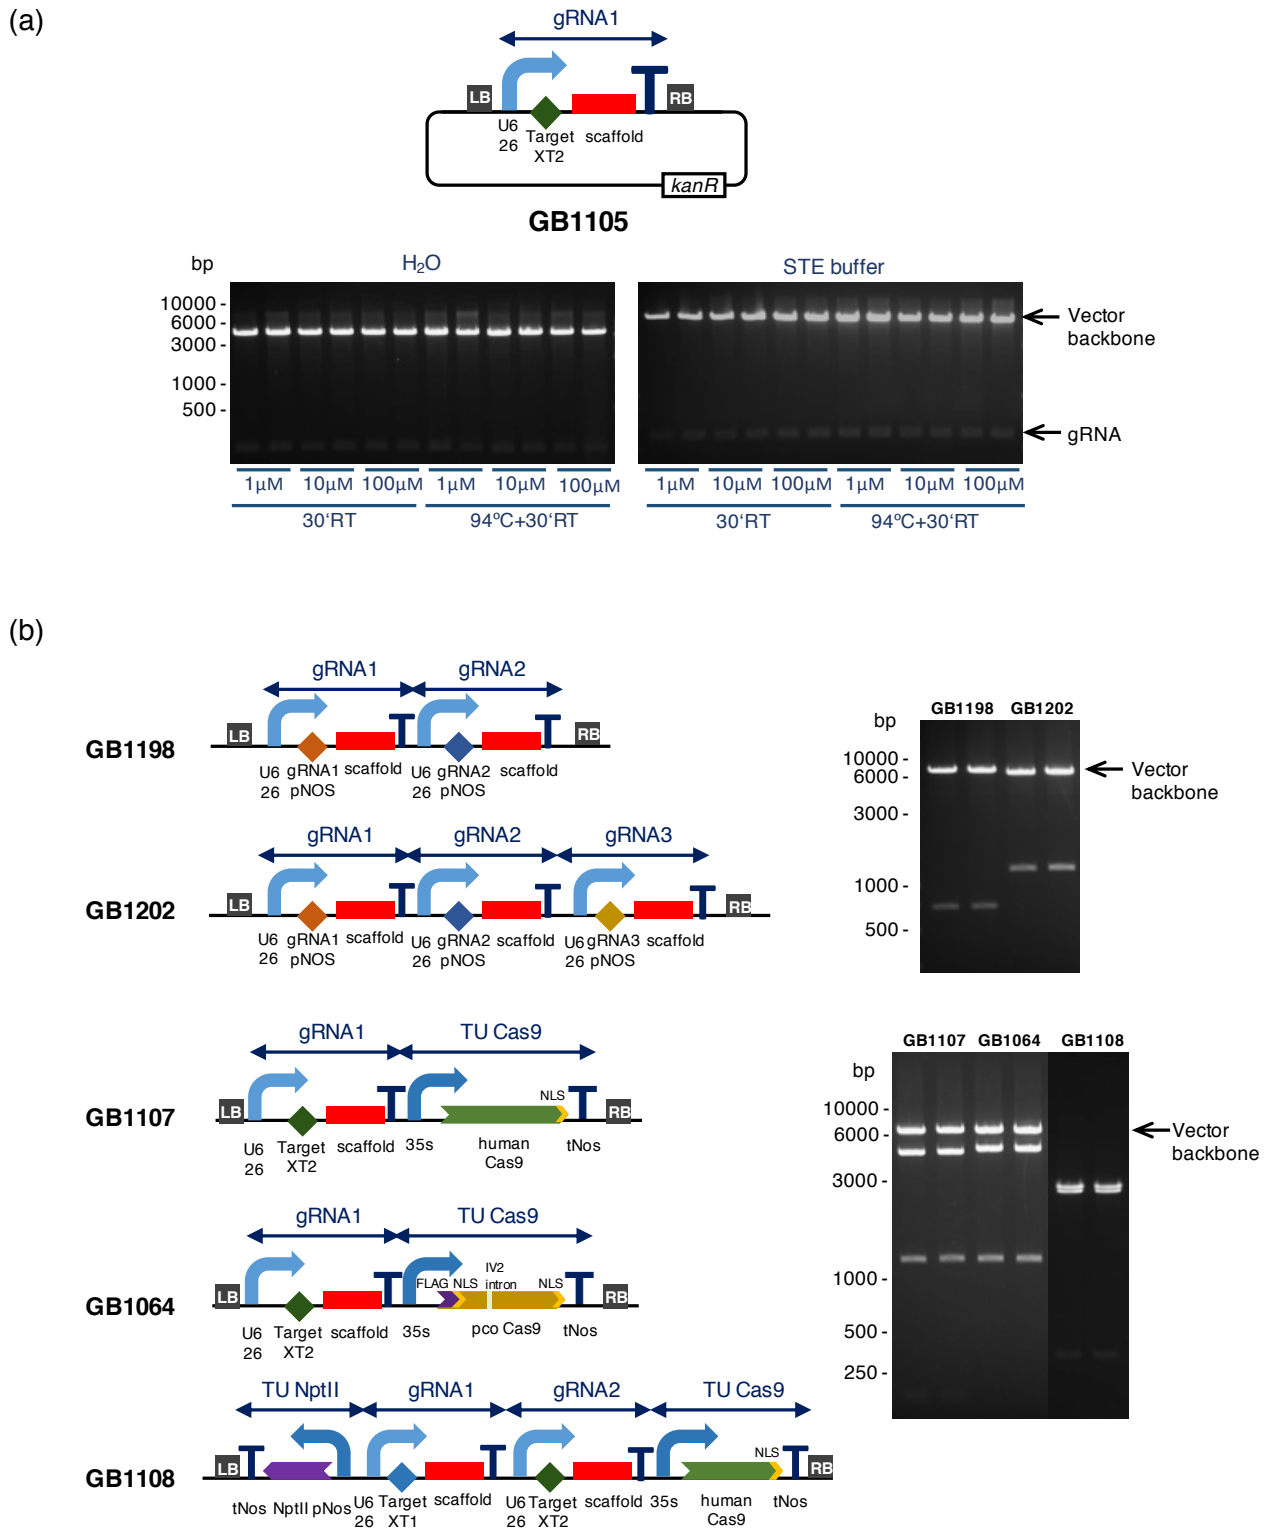

**Figure S1.** Cloning efficiency of representative Level $\geq 1$  GBElements. (a) Restriction analysis of 24 plasmids obtained from randomly selected colonies to test the accuracy of gRNA assemblies under different conditions (HindIII expected bands: 6345-374). (b) Restriction analysis of GB binary reactions combining gRNAs with each other and/or with the Cas9-encoding TU. All tested plasmids resulted in the expected restriction patterns. GB1198 BamHI expected bands: (6674-728); GB1202 EcoRI expected bands: (6345-1242); GB1107 EcoRV expected bands: (6674-4620-1236-194); GB1064 EcoRV expected bands: (6674-5117-1236); GB1108 EcoRI expected bands: (6987-6345-828).

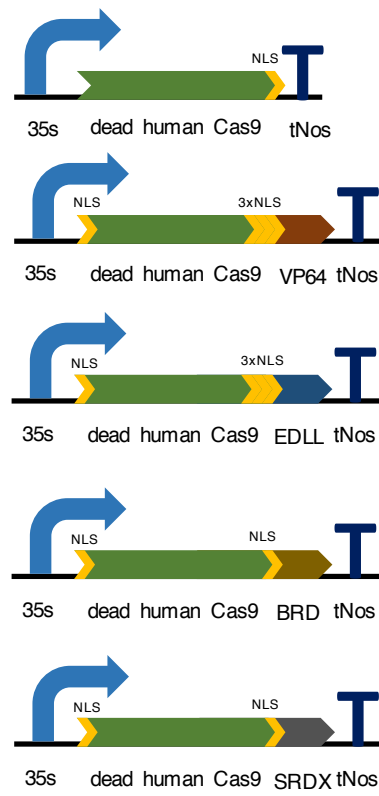

**Figure S2.** Schema of the architecture of the dead Cas9 transcriptional units tested on the repression and activation experiments.
