# Supplementary material for: A modular toolbox for gRNA–Cas9 genome engineering in plants based on the GoldenBraid standard
Source: PubMed Central journal article supplement (PMC4736081; doi:10.1186/s13007-016-0101-2), 2016-02-01
Supplement: 13007_2016_101_MOESM2_ESM.pdf [file 13007_2016_101_MOESM2_ESM.pdf]

**Table S1.** Primers used for the amplification of the *N.benthamiana* xylosyltransferases XT1 (Niben101Scf04205Ctg025) and XT2 (Niben101Scf04551Ctg021) regions.

|            |                                               |
|------------|-----------------------------------------------|
| XT1_F      | 5'-AACCACTTTTCCTCGTCGGAAA-3'                  |
| XT1_R      | 5'-TAACTATTCAACTAAAGCTCAAACAG-3'              |
| XT2_F      | 5'-AACCACTTTTCCTTGTCGGAAA-3'                  |
| XT2_R      | 5'-GGAATGAAATTAACCACTTCAGG-3'                 |
| XT12BsaI_F | 5'-GCGGGTCTCAGGAGCCCTAATGTTGCTTGGAGATC-3'     |
| XT12BsaI_R | 5'-GCGGGTCTCAAGCGCCGTCTAAGGTTCAATTTGAGTAGC-3' |

**Table S2.** List of forward and reverse primers used to construct the targets.

|                    |                                 |
|--------------------|---------------------------------|
| gRNA XT1_F         | 5'-ATTGAAAACACCGTCTTCGGAGA-3'   |
| gRNA XT1_R         | 5'-AAACTCTCCGAAGACGGTGTTTT-3'   |
| gRNA XT2_F         | 5'-ATTGAAAATTGGGAAAAAACTAG-3'   |
| gRNA XT2_R         | 5'-AAACCTAGTTTTTTCCCAATTTT-3'   |
| gRNA1 pNOS_F       | 5'-ATTGAGACTCTAATTGGATACCG-3'   |
| gRNA1 pNOS_R       | 5'-AAACCGGTATCCAATTAGAGTCT-3'   |
| gRNA2 pNOS_F       | 5'-ATTGACGTTCCATAAATCCCCT-3'    |
| gRNA2 pNOS_R       | 5'-AAACAGGGGAATTTATGGAACGT-3'   |
| gRNA3 pNOS_F       | 5'-ATTGACTTTTGAACGCGCAATAA-3'   |
| gRNA3 pNOS_R       | 5'-AAACTTATTGCGCGTTCAAAAGT-3'   |
| gRNA4 pNOS_F       | 5'-ATTGCCACTGAGCCGCGGTTTC-3'    |
| gRNA4 pNOS_R       | 5'-AAACGAAACCCGCGGCTCAGTGG-3'   |
| gRNA5 pNOS_F       | 5'-ATTGGGACAAGCCGTTTTACGTT-3'   |
| gRNA5 pNOS_R       | 5'-AAACAACGTAAAACGGCTTGTC-3'    |
| gRNA FT5447tRNA_F* | 5'-GTGCACCCAAAAGAAATGGTCCAAT-3' |
| gRNA FT5447tRNA_R* | 5'-AAACATTGGACCATTTCTTTTGGGT-3' |
| gRNA FT1272tRNA_F* | 5'-GTGCACCAATAAGCAATGGCGCAAT-3' |
| gRNA FT1272tRNA_R* | 5'-AAACATTGCGCCATTGCTTATTGGT-3' |
| gRNA FT2631tRNA_F* | 5'-GTGCACCGATAAACAATGGCGCAAT-3' |
| gRNA FT2631tRNA_R* | 5'-AAACATTGCGCCATTGTTTATCGGT-3' |
| gRNA XT4205tRNA_F* | 5'-GTGCAGAAAACACCGTCTTCGGAGA-3' |
| gRNA XT4205tRNA_R* | 5'-AAACTCTCCGAAGACGGTGTTTTCT-3' |
| gRNA XT4551tRNA_F* | 5'-GTGCAGAAAATTGGGAAAAAACTAG-3' |
| gRNA XT4551tRNA_R* | 5'-AAACCTAGTTTTTTCCCAATTTTCT-3' |

\*Primers used on the assembly of GBoligomers on level 0.

**Table S3.** List of GBelements generated in this work.

| <b>Level -1 GBparts</b> |                                          |                    |
|-------------------------|------------------------------------------|--------------------|
| <b>GBdatabase ID</b>    | <b>Name</b>                              |                    |
| GB1205                  | tRNA-gRNA position [D1_2]                |                    |
| GB1206                  | tRNA-gRNA position [2_n-1]               |                    |
| GB1207                  | tRNA-gRNA position [n]                   |                    |
| GB1208                  | tRNA-gRNA position [D1_n-1]              |                    |
| GB1209                  | tRNA-gRNA position [M1_2]                |                    |
| GB1210                  | tRNA-gRNA position [M1_n-1]              |                    |
| <b>Level 0 GBparts</b>  |                                          |                    |
| <b>GBdatabase ID</b>    | <b>Name</b>                              | <b>Category</b>    |
| GB0273                  | ppcoCas9                                 | B3-B4-B5           |
| GB0575                  | phCas9                                   | B3-B4-B5           |
| GB0645                  | psgRNA                                   | B6b-C1             |
| GB1001                  | pAtU6-26                                 | A1-A2-A3-B1-B2c    |
| GB1041                  | pdCas9                                   | B3-B4-B5           |
| GB1079                  | pdCas9                                   | B3-B4              |
| GB1175                  | pNLS-BRD                                 | B5                 |
| GB1184                  | pOsU3                                    | A1-A2-A3-B1-B2d    |
| GB1185                  | pNLS-SRDX                                | B5                 |
| GB1186                  | p3xNLS-VP64                              | B5                 |
| GB1187                  | p3xNLS-EDLL                              | B5                 |
| GB1204                  | pAtU6-1                                  | A1-A2-A3-B1-B2c    |
| GB1211                  | ptRNA-target5447_5494_17626FT-gRNA[D1_2] | Other              |
| GB1212                  | ptRNA-target1272FT-gRNA[2_n-1]           | Other              |
| GB1213                  | ptRNA-target2631FT-gRNA[n]               | Other              |
| GB1214                  | ptRNA-target4205XT-gRNA[D1_n-1]          | Other              |
| GB1215                  | ptRNA-target4551XT-gRNA[n]               | Other              |
| <b>Level 1 GB TUs</b>   |                                          |                    |
| <b>GBdatabase ID</b>    | <b>Name</b>                              | <b>% accuracy*</b> |
| GB0639                  | pEGB2 $\alpha$ 2 35s:hCas9:tNOS          | 100%               |
| GB0576                  | pEGB3 $\alpha$ 2 35s:pcoCas9:tNOS        | 50%                |
| GB1104                  | pEGB3 $\alpha$ 1 U626:gRNAXT4551:sgRNA   | 100%               |
| GB1105                  | pEGB3 $\alpha$ 2 U626:gRNAXT4205:sgRNA   | 100%               |
| GB1172                  | pEGB3 $\alpha$ 2 35s:hCas9:BRD:tNOS      | 100%               |
| GB1177                  | pEGB3 $\alpha$ 1 U626:gRNA1pNOS:sgRNA    | 100%               |
| GB1178                  | pEGB3 $\alpha$ 2 U626:gRNA1pNOS:sgRNA    | 100%               |
| GB1179                  | pEGB3 $\alpha$ 1 U626:gRNA2pNOS:sgRNA    | 100%               |
| GB1180                  | pEGB3 $\alpha$ 1 U626:gRNA4pNOS:sgRNA    | 100%               |
| GB1188                  | pEGB3 $\alpha$ 2 35s:hCas9:SRDX:tNOS     | 100%               |
| GB1189                  | pEGB3 $\alpha$ 2 35s:hCas9:VP64:tNOS     | 100%               |
| GB1190                  | pEGB3 $\alpha$ 2 35s:hCas9:EDLL:tNOS     | 100%               |
| GB1191                  | pEGB3 $\alpha$ 2 35s:dCas9:tNOS          | 100%               |
| GB1192                  | pEGB3 $\alpha$ 1 U626:gRNA3pNOS:sgRNA    | 100%               |
| GB1193                  | pEGB3 $\alpha$ 1 U626:gRNA5pNOS:sgRNA    | 100%               |
| GB1194                  | pEGB3 $\alpha$ 2 U626:gRNA3pNOS:sgRNA    | 100%               |
| GB1195                  | pEGB3 $\alpha$ 2 U626:gRNA5pNOS:sgRNA    | 100%               |
| GB1196                  | pEGB3 $\alpha$ 2 U626:gRNA2pNOS:sgRNA    | 75%                |
| GB1197                  | pEGB3 $\alpha$ 2 U626:gRNA4pNOS:sgRNA    | 100%               |
| GB1221                  | pEGB3 $\alpha$ 1 U626:gRNA1pDFR:sgRNA    | 100%               |

| Level >1 GB Modules |                                                                                         |      |
|---------------------|-----------------------------------------------------------------------------------------|------|
| GBdatabase ID       | Name                                                                                    |      |
| GB1064              | pEGB3Ω2 U6-26:target4551XT:sgRNA-35s:pcoCas9:tNOS                                       | 75%  |
| GB1106              | pEGB3Ω1 tNOS:nptII:pNOS-U626:target4205XT:sgRNA                                         | 100% |
| GB1107              | pEGB3Ω2 U6-26:target4551XT:sgRNA-35s:hCas9:tNOS                                         | 100% |
| GB1108              | pEGB 3α1 tNOS:nptII:pNOS-U626:target4205XT:sgRNA-U626:target4551XT:sgRNA-35s:hCas9:tNOS | 100% |
| GB1116              | pEGB3α1 pNOS:Luciferase:tNOS-SF-35S:Renilla:tNOS-35S:P19:tNOS-SF                        | 100% |
| GB1198              | pEGB3Ω1 U626:gRNA1pNOS:sgRNA-U626:gRNA2pNOS:sgRNA                                       | 100% |
| GB1199              | pEGB3Ω1 U626:gRNA1pNOS:sgRNA-U626:gRNA4pNOS:sgRNA                                       | 100% |
| GB1200              | pEGB3Ω1 U626:gRNA2pNOS:sgRNA-U626:gRNA4pNOS:sgRNA                                       | 100% |
| GB1201              | pEGB3Ω2 U626:gRNA4pNOS:sgRNA-SF                                                         | 100% |
| GB1202              | pEGB3α1 U626:gRNA1pNOS:sgRNA-U626:gRNA2pNOS:sgRNA-U626:gRNA4pNOS:sgRNA                  | 100% |
| GB1216              | pEGB3α1 U626:tRNA-target1FT-gRNA:tRNA-target2FT:gRNA:tRNA-target3FT-gRNA                | 100% |
| GB1217              | pEGB3α2 U626:tRNA-target1XT-gRNA:tRNA-target2XT:gRNA                                    | 100% |
| GB1218              | pEGB3Ω1 U626:tRNA-gRNA(x3withFTtargets)-U626:tRNA-gRNA(x2withXTtargets)                 | 100% |
| GB1219              | pEGB3Ω1 U626:gRNA3pNOS:sgRNA-U626:gRNA5pNOS:sgRNA                                       | 100% |
| GB1220              | pEGB3α1 U626:gRNA3pNOS:sgRNA-U626:gRNA5pNOS:sgRNA-U626:gRNA4pNOS:sgRNA                  | 100% |
| GB1222              | pEGB3α1 U626:tRNA-gRNA(x3withFTtargets)-U626:tRNA-gRNA(x2withXTtargets)-35s:hCas9:tNOS  | 100% |

\* Cloning accuracy expressed as the % of colonies showing the correct restriction pattern (number of colonies assayed 2-4).
